# Supplementary material for: Association studies of the copy-number variable ß-defensin cluster on 8p23.1 in adenocarcinoma and chronic pancreatitis
Source: PubMed Central journal article supplement (PMC3532138; doi:10.1186/1756-0500-5-629), 2012-11-13
Supplement: 1756-0500-5-629-S1.pdf [file 1756-0500-5-629-S1.pdf]

Additional file 1: Integer DEF cluster b copy numbers per diploid genome determined by MLPA, PDAC cohort

CN determination successful: 65

|    | <b>cohort</b> | <b>ID</b> | <b>CN (MLPA)</b> |
|----|---------------|-----------|------------------|
| 1  | PDAC          | 2560      | 3                |
| 2  | PDAC          | 2930      | 4                |
| 3  | PDAC          | 3060      | 7                |
| 4  | PDAC          | 3683      | 5                |
| 5  | PDAC          | 3946      | 3                |
| 6  | PDAC          | 4152      | 3                |
| 7  | PDAC          | 4206      | 4                |
| 8  | PDAC          | 4433      | 4                |
| 9  | PDAC          | 4956      | 3                |
| 10 | PDAC          | 7226      | 5                |
| 11 | PDAC          | 7325      | 3                |
| 12 | PDAC          | 7395      | 6                |
| 13 | PDAC          | 7524      | 4                |
| 14 | PDAC          | 7742      | 7                |
| 15 | PDAC          | 7856      | 4                |
| 16 | PDAC          | 7857      | 4                |
| 17 | PDAC          | 8134      | 4                |
| 18 | PDAC          | 8231      | 4                |
| 19 | PDAC          | 8368      | nd               |
| 20 | PDAC          | 8857      | nd               |
| 21 | PDAC          | 8904      | 2                |
| 22 | PDAC          | 9064      | 7                |
| 23 | PDAC          | 9232      | 5                |
| 24 | PDAC          | 9299      | 4                |
| 25 | PDAC          | 9501      | 5                |
| 26 | PDAC          | 9507      | 4                |
| 27 | PDAC          | 9710      | 2                |
| 28 | PDAC          | 9721      | nd               |
| 29 | PDAC          | 9734      | 4                |
| 30 | PDAC          | 9938      | 4                |
| 31 | PDAC          | 10050     | 5                |
| 32 | PDAC          | 10067     | 4                |
| 33 | PDAC          | 10403     | 3                |
| 34 | PDAC          | 10448     | 4                |
| 35 | PDAC          | 10655     | 5                |
| 36 | PDAC          | 173559    | 4                |
| 37 | PDAC          | 621849    | nd               |
| 38 | PDAC          | 627250    | 5                |
| 39 | PDAC          | 628826    | 5                |
| 40 | PDAC          | 631843    | 5                |
| 41 | PDAC          | 631965    | 5                |
| 42 | PDAC          | 635554    | 3                |
| 43 | PDAC          | 639913    | 3                |
| 44 | PDAC          | 643513    | 4                |
| 45 | PDAC          | 645009    | 3                |
| 46 | PDAC          | 646350    | 4                |

add01

|    |         |            |    |
|----|---------|------------|----|
| 47 | PDAC    | 646707     | 4  |
| 48 | PDAC    | 649071     | 5  |
| 49 | PDAC    | 650656     | 3  |
| 50 | PDAC    | 656670     | nd |
| 51 | PDAC    | 658988     | 4  |
| 52 | PDAC    | 659343     | 5  |
| 53 | PDAC    | 659667     | 5  |
| 54 | PDAC    | 664953     | 5  |
| 55 | PDAC    | 668064     | 3  |
| 56 | PDAC    | 670441     | nd |
| 57 | PDAC    | 679377     | 4  |
| 58 | PDAC    | 683599     | 4  |
| 59 | PDAC    | 683699     | 4  |
| 60 | PDAC    | 687567     | 5  |
| 61 | PDAC    | 690466     | 5  |
| 62 | PDAC    | 694155     | 6  |
| 63 | PDAC    | T005       | 5  |
| 64 | PDAC    | T011       | 4  |
| 65 | PDAC    | T039       | 3  |
| 66 | PDAC    | T089       | 4  |
| 67 | PDAC    | T100       | 4  |
| 68 | PDAC    | T181       | 4  |
| 69 | PDAC    | T197       | 3  |
| 70 | PDAC    | T220       | 4  |
| 71 | PDAC    | T244       | 5  |
|    | average | 4,21538462 |    |
|    | min     | 2          |    |
|    | max     | 7          |    |
|    | median  | 4,00       |    |
