# Supplementary material for: Association studies of the copy-number variable ß-defensin cluster on 8p23.1 in adenocarcinoma and chronic pancreatitis
Source: PubMed Central journal article supplement (PMC3532138; doi:10.1186/1756-0500-5-629), 2012-11-13
Supplement: 1756-0500-5-629-S2.pdf [file 1756-0500-5-629-S2.pdf]

Additional file 2: Integer DEF cluster b copy numbers per diploid genome determined by MLPA, CP cohort

CN determination successful:

63

|    | <b>cohort</b> | <b>ID</b> | <b>CN (MLPA)</b> |
|----|---------------|-----------|------------------|
| 1  | CP            | 3255      | 4                |
| 2  | CP            | 3525      | 5                |
| 3  | CP            | 3606      | 5                |
| 4  | CP            | 3630      | 6                |
| 5  | CP            | 3690      | 4                |
| 6  | CP            | 3695      | 7                |
| 7  | CP            | 3698      | 3                |
| 8  | CP            | 3826      | 5                |
| 9  | CP            | 3878      | 5                |
| 10 | CP            | 3992      | 3                |
| 11 | CP            | 4007      | 3                |
| 12 | CP            | 4008      | 5                |
| 13 | CP            | 4051      | 6                |
| 14 | CP            | 4059      | 4                |
| 15 | CP            | 4068      | 4                |
| 16 | CP            | 4105      | 5                |
| 17 | CP            | 4261      | 4                |
| 18 | CP            | 4264      | 4                |
| 19 | CP            | 4269      | 4                |
| 20 | CP            | 4533      | 3                |
| 21 | CP            | 4698      | 5                |
| 22 | CP            | 4856      | 6                |
| 23 | CP            | 4891      | 4                |
| 24 | CP            | 4926      | 3                |
| 25 | CP            | 4937      | 4                |
| 26 | CP            | 4945      | 5                |
| 27 | CP            | 4946      | 6                |
| 28 | CP            | 5007      | 6                |
| 29 | CP            | 5037      | 4                |
| 30 | CP            | 5047      | 4                |
| 31 | CP            | 5049      | 3                |
| 32 | CP            | 5054      | 5                |
| 33 | CP            | 7347      | 6                |
| 34 | CP            | 7517      | 6                |
| 35 | CP            | 8318      | 4                |
| 36 | CP            | 9189      | 5                |
| 37 | CP            | 9375      | 4                |
| 38 | CP            | 9707      | 4                |
| 39 | CP            | 10053     | 3                |
| 40 | CP            | 10071     | 6                |
| 41 | CP            | 10335     | 5                |
| 42 | CP            | 10337     | 4                |
| 43 | CP            | 199207    | nd               |
| 44 | CP            | 337456    | 5                |
| 45 | CP            | 342023    | 4                |
| 46 | CP            | 505226    | 5                |

|    |         |            |    |
|----|---------|------------|----|
| 47 | CP      | 586129     | 5  |
| 48 | CP      | 607752     | 4  |
| 49 | CP      | 629988     | 6  |
| 50 | CP      | 643449     | 5  |
| 51 | CP      | 660891     | nd |
| 52 | CP      | 664369     | 3  |
| 53 | CP      | 686701     | 5  |
| 54 | CP      | 725672     | 4  |
| 55 | CP      | T044       | 5  |
| 56 | CP      | T052       | 4  |
| 57 | CP      | T059       | 5  |
| 58 | CP      | T062       | 5  |
| 59 | CP      | T073       | 6  |
| 60 | CP      | T105       | 4  |
| 61 | CP      | T130       | 4  |
| 62 | CP      | T206       | 6  |
| 63 | CP      | T215       | 4  |
| 64 | CP      | T233       | 4  |
| 65 | CP      | T333       | 4  |
|    | average | 4,57142857 |    |
|    | min     | 3          |    |
|    | max     | 7          |    |
|    | median  | 4,00       |    |
