# Supplementary material for: Association studies of the copy-number variable ß-defensin cluster on 8p23.1 in adenocarcinoma and chronic pancreatitis
Source: PubMed Central journal article supplement (PMC3532138; doi:10.1186/1756-0500-5-629), 2012-11-13
Supplement: 1756-0500-5-629-S3.pdf [file 1756-0500-5-629-S3.pdf]

Additional file 3: Integer DEF cluster b copy numbers per diploid genome determined by MLPA, CARLA1 cohort

CN determination successful:

232

|    | <b>cohort</b> | <b>ID</b> | <b>CN (MLPA)</b> |
|----|---------------|-----------|------------------|
| 1  | CARLA1        | 1100011   | 5                |
| 2  | CARLA1        | 1100672   | 6                |
| 3  | CARLA1        | 1102582   | 5                |
| 4  | CARLA1        | 1105126   | 3                |
| 5  | CARLA1        | 1108917   | 4                |
| 6  | CARLA1        | 1110831   | 5                |
| 7  | CARLA1        | 1122283   | 5                |
| 8  | CARLA1        | 1122290   | 5                |
| 9  | CARLA1        | 1122930   | 4                |
| 10 | CARLA1        | 1200712   | 6                |
| 11 | CARLA1        | 1201611   | 5                |
| 12 | CARLA1        | 1202898   | 4                |
| 13 | CARLA1        | 1204160   | 5                |
| 14 | CARLA1        | 1206086   | 5                |
| 15 | CARLA1        | 1207358   | 3                |
| 16 | CARLA1        | 1208620   | nd               |
| 17 | CARLA1        | 1210538   | 4                |
| 18 | CARLA1        | 1214358   | 5                |
| 19 | CARLA1        | 2110247   | 5                |
| 20 | CARLA1        | 2111519   | 3                |
| 21 | CARLA1        | 2124255   | 4                |
| 22 | CARLA1        | 2204184   | 6                |
| 23 | CARLA1        | 2211184   | 4                |
| 24 | CARLA1        | 2212440   | 5                |
| 25 | CARLA1        | 2215012   | 2                |
| 26 | CARLA1        | 2216276   | 4                |
| 27 | CARLA1        | 2222012   | 4                |
| 28 | CARLA1        | 2222650   | 4                |
| 29 | CARLA1        | 2224577   | 4                |
| 30 | CARLA1        | 2225855   | nd               |
| 31 | CARLA1        | 2226493   | 4                |
| 32 | CARLA1        | 2228405   | 5                |
| 33 | CARLA1        | 2230939   | 3                |
| 34 | CARLA1        | 3100819   | nd               |
| 35 | CARLA1        | 3102014   | 5                |
| 36 | CARLA1        | 3104562   | 6                |
| 37 | CARLA1        | 3106489   | 6                |
| 38 | CARLA1        | 3108318   | 4                |
| 39 | CARLA1        | 3108382   | 5                |
| 40 | CARLA1        | 3109000   | 4                |
| 41 | CARLA1        | 3109022   | 4                |
| 42 | CARLA1        | 3109648   | 5                |
| 43 | CARLA1        | 3109660   | 4                |
| 44 | CARLA1        | 3110278   | 4                |
| 45 | CARLA1        | 3110290   | 4                |
| 46 | CARLA1        | 3110930   | 5                |

|    |        |         |   |
|----|--------|---------|---|
| 47 | CARLA1 | 3114112 | 4 |
| 48 | CARLA1 | 3121721 | 5 |
| 49 | CARLA1 | 3121744 | 6 |
| 50 | CARLA1 | 3123654 | 5 |
| 51 | CARLA1 | 3126799 | 5 |
| 52 | CARLA1 | 3126865 | 6 |
| 53 | CARLA1 | 3128143 | 4 |
| 54 | CARLA1 | 3130045 | 3 |
| 55 | CARLA1 | 3133782 | 5 |
| 56 | CARLA1 | 3200857 | 4 |
| 57 | CARLA1 | 3204217 | 4 |
| 58 | CARLA1 | 3208698 | 5 |
| 59 | CARLA1 | 3208706 | 4 |
| 60 | CARLA1 | 3210614 | 4 |
| 61 | CARLA1 | 3213140 | 3 |
| 62 | CARLA1 | 3216321 | 5 |
| 63 | CARLA1 | 3218231 | 4 |
| 64 | CARLA1 | 3221411 | 4 |
| 65 | CARLA1 | 3223918 | 4 |
| 66 | CARLA1 | 4100260 | 2 |
| 67 | CARLA1 | 4100276 | 3 |
| 68 | CARLA1 | 4100900 | 5 |
| 69 | CARLA1 | 4102039 | 4 |
| 70 | CARLA1 | 4102068 | 5 |
| 71 | CARLA1 | 4103932 | 4 |
| 72 | CARLA1 | 4103961 | 6 |
| 73 | CARLA1 | 4104593 | 4 |
| 74 | CARLA1 | 4107150 | 7 |
| 75 | CARLA1 | 4108409 | 2 |
| 76 | CARLA1 | 4108993 | 4 |
| 77 | CARLA1 | 4110949 | 6 |
| 78 | CARLA1 | 4112180 | 5 |
| 79 | CARLA1 | 4115349 | 4 |
| 80 | CARLA1 | 4117319 | 4 |
| 81 | CARLA1 | 4118595 | 3 |
| 82 | CARLA1 | 4120505 | 5 |
| 83 | CARLA1 | 4122421 | 4 |
| 84 | CARLA1 | 4122993 | 4 |
| 85 | CARLA1 | 4125610 | 5 |
| 86 | CARLA1 | 4128754 | 4 |
| 87 | CARLA1 | 4129386 | 5 |
| 88 | CARLA1 | 4131928 | 5 |
| 89 | CARLA1 | 4133206 | 4 |
| 90 | CARLA1 | 4201741 | 6 |
| 91 | CARLA1 | 4206193 | 5 |
| 92 | CARLA1 | 4206833 | 3 |
| 93 | CARLA1 | 4208105 | 4 |
| 94 | CARLA1 | 4208714 | 4 |
| 95 | CARLA1 | 4210020 | 5 |
| 96 | CARLA1 | 4213170 | 5 |
| 97 | CARLA1 | 4214471 | 4 |

|     |        |         |    |
|-----|--------|---------|----|
| 98  | CARLA1 | 4221442 | 4  |
| 99  | CARLA1 | 4224653 | 3  |
| 100 | CARLA1 | 4227150 | 4  |
| 101 | CARLA1 | 4231618 | 4  |
| 102 | CARLA1 | 4234203 | 5  |
| 103 | CARLA1 | 5102099 | 4  |
| 104 | CARLA1 | 5102722 | 5  |
| 105 | CARLA1 | 5103354 | 3  |
| 106 | CARLA1 | 5104610 | 4  |
| 107 | CARLA1 | 5105270 | nd |
| 108 | CARLA1 | 5105910 | 4  |
| 109 | CARLA1 | 5107814 | 6  |
| 110 | CARLA1 | 5108392 | 4  |
| 111 | CARLA1 | 5109109 | 6  |
| 112 | CARLA1 | 5112264 | 5  |
| 113 | CARLA1 | 5112910 | 4  |
| 114 | CARLA1 | 5114122 | 4  |
| 115 | CARLA1 | 5114197 | 4  |
| 116 | CARLA1 | 5114754 | 5  |
| 117 | CARLA1 | 5114814 | 4  |
| 118 | CARLA1 | 5116664 | 5  |
| 119 | CARLA1 | 5116724 | 4  |
| 120 | CARLA1 | 5119208 | 4  |
| 121 | CARLA1 | 5119272 | 5  |
| 122 | CARLA1 | 5121814 | 4  |
| 123 | CARLA1 | 5122392 | 4  |
| 124 | CARLA1 | 5124959 | 5  |
| 125 | CARLA1 | 5126295 | 4  |
| 126 | CARLA1 | 5126303 | 6  |
| 127 | CARLA1 | 5126875 | 2  |
| 128 | CARLA1 | 5127515 | 3  |
| 129 | CARLA1 | 5128153 | 4  |
| 130 | CARLA1 | 5130701 | 4  |
| 131 | CARLA1 | 5201000 | 6  |
| 132 | CARLA1 | 5201766 | 4  |
| 133 | CARLA1 | 5203050 | 3  |
| 134 | CARLA1 | 5203676 | 3  |
| 135 | CARLA1 | 5205586 | 3  |
| 136 | CARLA1 | 5206226 | 5  |
| 137 | CARLA1 | 5206232 | 5  |
| 138 | CARLA1 | 5206870 | 5  |
| 139 | CARLA1 | 5207510 | 4  |
| 140 | CARLA1 | 5208136 | 3  |
| 141 | CARLA1 | 5210676 | 5  |
| 142 | CARLA1 | 5211894 | 5  |
| 143 | CARLA1 | 5212592 | 5  |
| 144 | CARLA1 | 5213210 | 5  |
| 145 | CARLA1 | 5214496 | 4  |
| 146 | CARLA1 | 5214504 | 3  |
| 147 | CARLA1 | 5215136 | 5  |
| 148 | CARLA1 | 5215142 | 4  |

|     |        |         |    |
|-----|--------|---------|----|
| 149 | CARLA1 | 5215751 | 5  |
| 150 | CARLA1 | 5217046 | 4  |
| 151 | CARLA1 | 5217603 | 8  |
| 152 | CARLA1 | 5217661 | 4  |
| 153 | CARLA1 | 5218301 | 3  |
| 154 | CARLA1 | 5218933 | 5  |
| 155 | CARLA1 | 5219588 | 4  |
| 156 | CARLA1 | 5221496 | 4  |
| 157 | CARLA1 | 5222142 | 5  |
| 158 | CARLA1 | 5222768 | 5  |
| 159 | CARLA1 | 5222774 | 4  |
| 160 | CARLA1 | 5223420 | 5  |
| 161 | CARLA1 | 5223992 | 4  |
| 162 | CARLA1 | 5224709 | 5  |
| 163 | CARLA1 | 5225324 | 4  |
| 164 | CARLA1 | 5225330 | 3  |
| 165 | CARLA1 | 5225985 | 8  |
| 166 | CARLA1 | 5227889 | 5  |
| 167 | CARLA1 | 5228481 | 4  |
| 168 | CARLA1 | 5229799 | 6  |
| 169 | CARLA1 | 5230437 | 5  |
| 170 | CARLA1 | 5231069 | 4  |
| 171 | CARLA1 | 5231655 | 5  |
| 172 | CARLA1 | 5231661 | 4  |
| 173 | CARLA1 | 5232287 | 3  |
| 174 | CARLA1 | 5233602 | 3  |
| 175 | CARLA1 | 6100441 | 3  |
| 176 | CARLA1 | 6101044 | 3  |
| 177 | CARLA1 | 6101481 | 5  |
| 178 | CARLA1 | 6104025 | 5  |
| 179 | CARLA1 | 6105310 | 4  |
| 180 | CARLA1 | 6105326 | 4  |
| 181 | CARLA1 | 6107213 | 3  |
| 182 | CARLA1 | 6107800 | 6  |
| 183 | CARLA1 | 6107868 | nd |
| 184 | CARLA1 | 6109761 | 4  |
| 185 | CARLA1 | 6114160 | 4  |
| 186 | CARLA1 | 6117387 | 6  |
| 187 | CARLA1 | 6117967 | 5  |
| 188 | CARLA1 | 6119883 | 5  |
| 189 | CARLA1 | 6120573 | 3  |
| 190 | CARLA1 | 6122490 | 4  |
| 191 | CARLA1 | 6123130 | 5  |
| 192 | CARLA1 | 6124996 | 6  |
| 193 | CARLA1 | 6125056 | 5  |
| 194 | CARLA1 | 6125694 | 5  |
| 195 | CARLA1 | 6125702 | 4  |
| 196 | CARLA1 | 6126280 | 5  |
| 197 | CARLA1 | 6126340 | 5  |
| 198 | CARLA1 | 6127606 | 4  |
| 199 | CARLA1 | 6127612 | 5  |

|     |         |            |   |
|-----|---------|------------|---|
| 200 | CARLA1  | 6128899    | 4 |
| 201 | CARLA1  | 6129462    | 4 |
| 202 | CARLA1  | 6132079    | 8 |
| 203 | CARLA1  | 6132642    | 4 |
| 204 | CARLA1  | 6133334    | 6 |
| 205 | CARLA1  | 6200480    | 5 |
| 206 | CARLA1  | 6201113    | 5 |
| 207 | CARLA1  | 6202443    | 4 |
| 208 | CARLA1  | 6202450    | 5 |
| 209 | CARLA1  | 6204991    | 3 |
| 210 | CARLA1  | 6207541    | 4 |
| 211 | CARLA1  | 6208813    | 4 |
| 212 | CARLA1  | 6210030    | 4 |
| 213 | CARLA1  | 6212000    | 5 |
| 214 | CARLA1  | 6213263    | 5 |
| 215 | CARLA1  | 6213903    | 5 |
| 216 | CARLA1  | 6218929    | 6 |
| 217 | CARLA1  | 6219633    | 4 |
| 218 | CARLA1  | 6224090    | 5 |
| 219 | CARLA1  | 6226656    | 4 |
| 220 | CARLA1  | 6229206    | 5 |
| 221 | CARLA1  | 6232958    | 4 |
| 222 | CARLA1  | 7101218    | 4 |
| 223 | CARLA1  | 7105400    | 5 |
| 224 | CARLA1  | 7106032    | 4 |
| 225 | CARLA1  | 7107209    | 4 |
| 226 | CARLA1  | 7109220    | 3 |
| 227 | CARLA1  | 7116740    | 6 |
| 228 | CARLA1  | 7118006    | 5 |
| 229 | CARLA1  | 7123119    | 3 |
| 230 | CARLA1  | 7125680    | 5 |
| 231 | CARLA1  | 7130770    | 3 |
| 232 | CARLA1  | 7205716    | 5 |
| 233 | CARLA1  | 7205722    | 4 |
| 234 | CARLA1  | 7207626    | 5 |
| 235 | CARLA1  | 7219606    | 3 |
| 236 | CARLA1  | 7225995    | 3 |
| 237 | CARLA1  | 7231725    | 4 |
|     | average | 4,41810345 |   |
|     | min     | 2          |   |
|     | max     | 8          |   |
|     | median  | 4,00       |   |
