# Supplementary material for: Association studies of the copy-number variable ß-defensin cluster on 8p23.1 in adenocarcinoma and chronic pancreatitis
Source: PubMed Central journal article supplement (PMC3532138; doi:10.1186/1756-0500-5-629), 2012-11-13
Supplement: 1756-0500-5-629-S4.pdf [file 1756-0500-5-629-S4.pdf]

Additional file 4: Integer DEF cluster b copy numbers per diploid genome determined by MLPA, CARLA2 cohort

CN determination successful:

161

|    | <b>cohort</b> | <b>ID</b> | <b>CN (MLPA)</b> |
|----|---------------|-----------|------------------|
| 1  | CARLA2        | 1100028   | 4                |
| 2  | CARLA2        | 1100040   | 5                |
| 3  | CARLA2        | 1101281   | 4                |
| 4  | CARLA2        | 1101938   | 4                |
| 5  | CARLA2        | 1102560   | 3                |
| 6  | CARLA2        | 1102576   | 3                |
| 7  | CARLA2        | 1103185   | 6                |
| 8  | CARLA2        | 1103200   | 4                |
| 9  | CARLA2        | 1103819   | 4                |
| 10 | CARLA2        | 1103825   | 4                |
| 11 | CARLA2        | 1103831   | 5                |
| 12 | CARLA2        | 1105741   | 4                |
| 13 | CARLA2        | 1105758   | 2                |
| 14 | CARLA2        | 1105764   | 5                |
| 15 | CARLA2        | 1106380   | 8                |
| 16 | CARLA2        | 1106404   | 4                |
| 17 | CARLA2        | 1107651   | 4                |
| 18 | CARLA2        | 1107668   | 5                |
| 19 | CARLA2        | 1107674   | 5                |
| 20 | CARLA2        | 1108283   | 4                |
| 21 | CARLA2        | 1108290   | 5                |
| 22 | CARLA2        | 1110191   | 5                |
| 23 | CARLA2        | 1110200   | 6                |
| 24 | CARLA2        | 1110216   | 4                |
| 25 | CARLA2        | 1110854   | 4                |
| 26 | CARLA2        | 1111492   | 5                |
| 27 | CARLA2        | 1112103   | 3                |
| 28 | CARLA2        | 1112110   | 5                |
| 29 | CARLA2        | 1112126   | 5                |
| 30 | CARLA2        | 1112735   | 6                |
| 31 | CARLA2        | 1112758   | 5                |
| 32 | CARLA2        | 1113396   | 4                |
| 33 | CARLA2        | 1114036   | 6                |
| 34 | CARLA2        | 1114668   | 4                |
| 35 | CARLA2        | 1115283   | 4                |
| 36 | CARLA2        | 1117187   | 4                |
| 37 | CARLA2        | 1117827   | 5                |
| 38 | CARLA2        | 1117833   | 5                |
| 39 | CARLA2        | 1118471   | 4                |
| 40 | CARLA2        | 1119105   | 4                |
| 41 | CARLA2        | 1119111   | 5                |
| 42 | CARLA2        | 1119750   | 5                |
| 43 | CARLA2        | 1121013   | 4                |
| 44 | CARLA2        | 1122308   | 4                |
| 45 | CARLA2        | 1122923   | 5                |
| 46 | CARLA2        | 1122946   | 5                |

add4

|    |        |         |    |
|----|--------|---------|----|
| 47 | CARLA2 | 1123584 | 2  |
| 48 | CARLA2 | 1124218 | 6  |
| 49 | CARLA2 | 1124862 | 4  |
| 50 | CARLA2 | 1125494 | nd |
| 51 | CARLA2 | 1126134 | 4  |
| 52 | CARLA2 | 1126772 | nd |
| 53 | CARLA2 | 1127412 | 6  |
| 54 | CARLA2 | 1128699 | 4  |
| 55 | CARLA2 | 1128707 | 8  |
| 56 | CARLA2 | 1129322 | 4  |
| 57 | CARLA2 | 1129954 | 5  |
| 58 | CARLA2 | 1131230 | 6  |
| 59 | CARLA2 | 1131879 | 4  |
| 60 | CARLA2 | 1132494 | 5  |
| 61 | CARLA2 | 1133140 | 5  |
| 62 | CARLA2 | 1133766 | 4  |
| 63 | CARLA2 | 1133772 | 5  |
| 64 | CARLA2 | 1201605 | 4  |
| 65 | CARLA2 | 1202243 | 4  |
| 66 | CARLA2 | 1202875 | 5  |
| 67 | CARLA2 | 1211800 | 4  |
| 68 | CARLA2 | 1215607 | 5  |
| 69 | CARLA2 | 1220063 | 3  |
| 70 | CARLA2 | 1225184 | 4  |
| 71 | CARLA2 | 1227734 | 2  |
| 72 | CARLA2 | 1230914 | 4  |
| 73 | CARLA2 | 2100102 | 3  |
| 74 | CARLA2 | 2101350 | 6  |
| 75 | CARLA2 | 2101969 | 3  |
| 76 | CARLA2 | 2101975 | 4  |
| 77 | CARLA2 | 2103879 | 4  |
| 78 | CARLA2 | 2104519 | 4  |
| 79 | CARLA2 | 2104525 | 5  |
| 80 | CARLA2 | 2105134 | 6  |
| 81 | CARLA2 | 2106435 | 5  |
| 82 | CARLA2 | 2107044 | 4  |
| 83 | CARLA2 | 2107050 | 4  |
| 84 | CARLA2 | 2107647 | 4  |
| 85 | CARLA2 | 2108345 | 5  |
| 86 | CARLA2 | 2112140 | 4  |
| 87 | CARLA2 | 2112157 | 3  |
| 88 | CARLA2 | 2112772 | 6  |
| 89 | CARLA2 | 2114647 | 4  |
| 90 | CARLA2 | 2114707 | 4  |
| 91 | CARLA2 | 2115902 | 4  |
| 92 | CARLA2 | 2116540 | 4  |
| 93 | CARLA2 | 2116617 | 5  |
| 94 | CARLA2 | 2117858 | 4  |
| 95 | CARLA2 | 2118504 | 5  |
| 96 | CARLA2 | 2119739 | 4  |
| 97 | CARLA2 | 2119797 | 6  |

add4

|     |        |         |    |    |
|-----|--------|---------|----|----|
| 98  | CARLA2 | 2120429 | 5  |    |
| 99  | CARLA2 | 2121050 | 4  |    |
| 100 | CARLA2 | 2121707 | 7  |    |
| 101 | CARLA2 | 2122977 | 3  |    |
| 102 | CARLA2 | 2130592 | 5  |    |
| 103 | CARLA2 | 2133188 | 6  |    |
| 104 | CARLA2 | 2213102 | 4  |    |
| 105 | CARLA2 | 2225223 | 6  |    |
| 106 | CARLA2 | 2226501 | 3  |    |
| 107 | CARLA2 | 3100185 | 6  |    |
| 108 | CARLA2 | 3100200 | 4  |    |
| 109 | CARLA2 | 3102669 | 6  |    |
| 110 | CARLA2 | 3103290 | 6  |    |
| 111 | CARLA2 | 3103918 | 5  |    |
| 112 | CARLA2 | 3109594 | 5  |    |
| 113 | CARLA2 | 3114678 | 6  |    |
| 114 | CARLA2 | 3115301 | 4  |    |
| 115 | CARLA2 | 3117843 | 6  |    |
| 116 | CARLA2 | 3117910 | 5  |    |
| 117 | CARLA2 | 3118558 | 5  |    |
| 118 | CARLA2 | 3121106 | 5  |    |
| 119 | CARLA2 | 3126150 | 5  |    |
| 120 | CARLA2 | 3131955 | 4  |    |
| 121 | CARLA2 | 3132529 | 4  |    |
| 122 | CARLA2 | 3133167 | 4  |    |
| 123 | CARLA2 | 3205493 | 6  |    |
| 124 | CARLA2 | 3216315 | 5  |    |
| 125 | CARLA2 | 4213773 | 4  |    |
| 126 | CARLA2 | 1100011 | 5  | *) |
| 127 | CARLA2 | 1100672 | 6  | *) |
| 128 | CARLA2 | 1102582 | 5  | *) |
| 129 | CARLA2 | 1105126 | 3  | *) |
| 130 | CARLA2 | 1108917 | 4  | *) |
| 131 | CARLA2 | 1110831 | 5  | *) |
| 132 | CARLA2 | 1122283 | 5  | *) |
| 133 | CARLA2 | 1122290 | 5  | *) |
| 134 | CARLA2 | 1122930 | 4  | *) |
| 135 | CARLA2 | 1200712 | 6  | *) |
| 136 | CARLA2 | 1204160 | 5  | *) |
| 137 | CARLA2 | 1206086 | 5  | *) |
| 138 | CARLA2 | 1207358 | 3  | *) |
| 139 | CARLA2 | 1208620 | nd | *) |
| 140 | CARLA2 | 1210538 | 4  | *) |
| 141 | CARLA2 | 1214358 | 5  | *) |
| 142 | CARLA2 | 2110247 | 5  | *) |
| 143 | CARLA2 | 2111519 | 3  | *) |
| 144 | CARLA2 | 2124255 | 4  | *) |
| 145 | CARLA2 | 3121744 | 6  | *) |
| 146 | CARLA2 | 3128143 | 4  | *) |
| 147 | CARLA2 | 3130045 | 3  | *) |
| 148 | CARLA2 | 4100260 | 2  | *) |

add4

|     |         |            |    |    |
|-----|---------|------------|----|----|
| 149 | CARLA2  | 4100282    | nd | *) |
| 150 | CARLA2  | 4100900    | 5  | *) |
| 151 | CARLA2  | 4102068    | 5  | *) |
| 152 | CARLA2  | 4107150    | 7  | *) |
| 153 | CARLA2  | 4117319    | 4  | *) |
| 154 | CARLA2  | 4118595    | 3  | *) |
| 155 | CARLA2  | 4128754    | 4  | *) |
| 156 | CARLA2  | 4133206    | 4  | *) |
| 157 | CARLA2  | 5201766    | 4  | *) |
| 158 | CARLA2  | 5205586    | 3  | *) |
| 159 | CARLA2  | 5219588    | 4  | *) |
| 160 | CARLA2  | 5222142    | 5  | *) |
| 161 | CARLA2  | 5225330    | 3  | *) |
| 162 | CARLA2  | 5229799    | 6  | *) |
| 163 | CARLA2  | 6101044    | 3  | *) |
| 164 | CARLA2  | 6125694    | 5  | *) |
| 165 | CARLA2  | 6132079    | 8  | *) |
|     | average | 4,55279503 |    |    |
|     | min     | 2          |    |    |
|     | max     | 8          |    |    |
|     | median  | 4,00       |    |    |

\*) these samples overlap with the CARLA1 control cohort
