# Supplementary material for: Association studies of the copy-number variable ß-defensin cluster on 8p23.1 in adenocarcinoma and chronic pancreatitis
Source: PubMed Central journal article supplement (PMC3532138; doi:10.1186/1756-0500-5-629), 2012-11-13
Supplement: 1756-0500-5-629-S5.pdf [file 1756-0500-5-629-S5.pdf]

## Additional file 5: Summary of DEF cluster b CN distribution

| DEF<br>cluster b<br>CN | PDAC | f    | CARLA1 | f    | CP | f    | CARLA2 | f    |
|------------------------|------|------|--------|------|----|------|--------|------|
| 2                      | 2    | 0,03 | 4      | 0,02 |    | 0,00 | 4      | 0,02 |
| 3                      | 13   | 0,20 | 31     | 0,13 | 8  | 0,13 | 17     | 0,11 |
| 4                      | 27   | 0,42 | 93     | 0,40 | 24 | 0,38 | 62     | 0,39 |
| 5                      | 18   | 0,28 | 79     | 0,34 | 19 | 0,30 | 50     | 0,31 |
| 6                      | 2    | 0,03 | 21     | 0,09 | 11 | 0,17 | 23     | 0,14 |
| 7                      | 3    | 0,05 | 1      | 0,00 | 1  | 0,02 | 2      | 0,01 |
| 8                      |      |      | 3      | 0,01 |    |      | 3      | 0,02 |
|                        | 65   |      | 232    |      | 63 |      | 161    |      |
