# Supplementary material for: Association studies of the copy-number variable ß-defensin cluster on 8p23.1 in adenocarcinoma and chronic pancreatitis
Source: PubMed Central journal article supplement (PMC3532138; doi:10.1186/1756-0500-5-629), 2012-11-13
Supplement: 1756-0500-5-629-S6.pdf [file 1756-0500-5-629-S6.pdf]

**Additional file 6: Statistics for comparisons of DEF cluster b CN distribution**

**MLPA, PDAC**

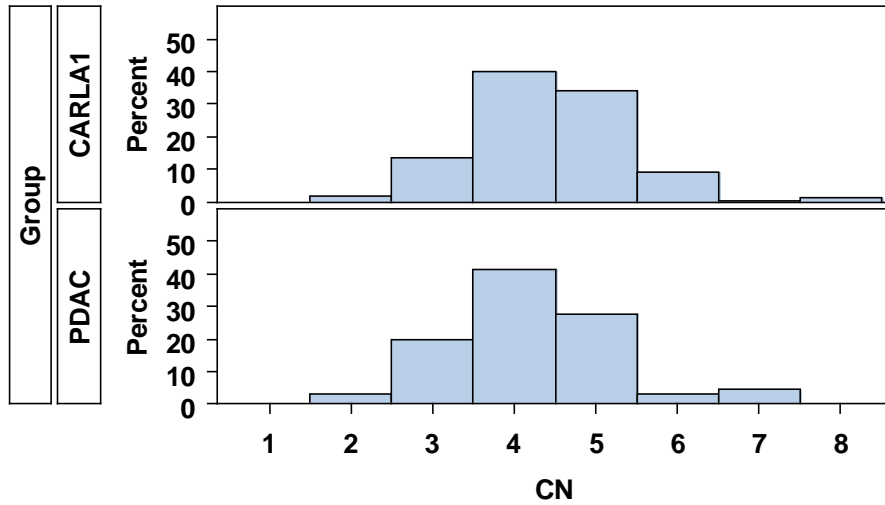

Mean difference in DEF cluster b CN (copies per diploid genome)

CARLA1- PDAC: 0.20

[95%-CI, p-value]: [-0.07; 0.48, p=0.15]

**MLPA, CP**

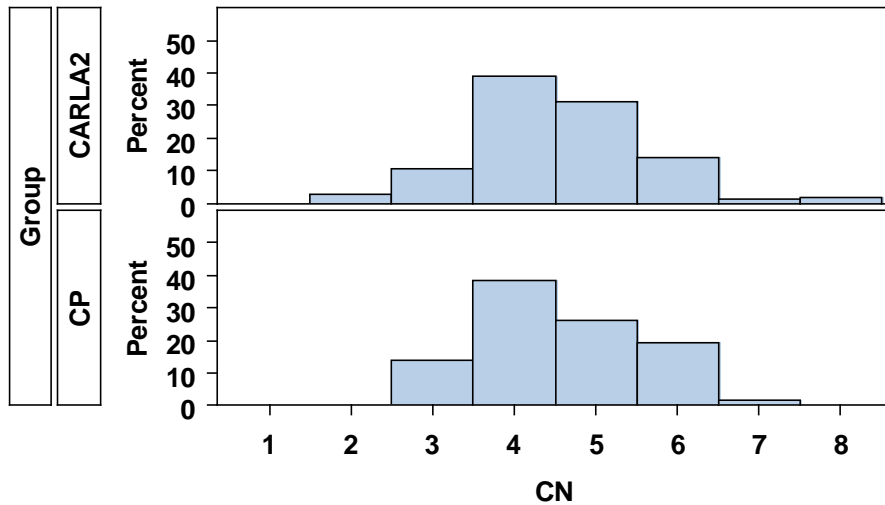

Mean difference in DEF cluster b CN (copies per diploid genome)

CARLA2- CP: -0.02

[95%-CI, p-value]: [-0.34; 0.31, p=0.92]
